# Supplementary material for: Tumor-exosomes and leukocyte activation: an ambivalent crosstalk
Source: PubMed Central journal article supplement (PMC3519567; doi:10.1186/1478-811x-10-37), 2012-11-28
Supplement: 1478-811X-10-37-S1.pdf [file 1478-811X-10-37-S1.pdf]

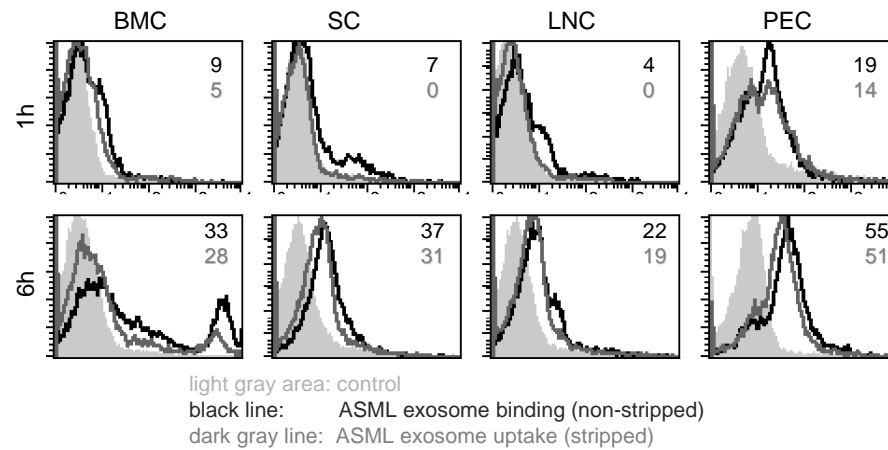

Add.File 1 Tumor-exosome uptake by leukocytes BMC, SC, LNC and PEC were incubated at 37°C with RhDHPE-labeled ASML-exosomes for 1h or 6h. Exosome binding and uptake (fluorescence after 2 acid washes) was evaluated by flow-cytometry. Representative examples are shown. The percentage of cells with bound or uptaken exosomes are indicated.
