# Supplementary material for: Tumor-exosomes and leukocyte activation: an ambivalent crosstalk
Source: PubMed Central journal article supplement (PMC3519567; doi:10.1186/1478-811x-10-37), 2012-11-28
Supplement: 1478-811X-10-37-S2.pdf [file 1478-811X-10-37-S2.pdf]

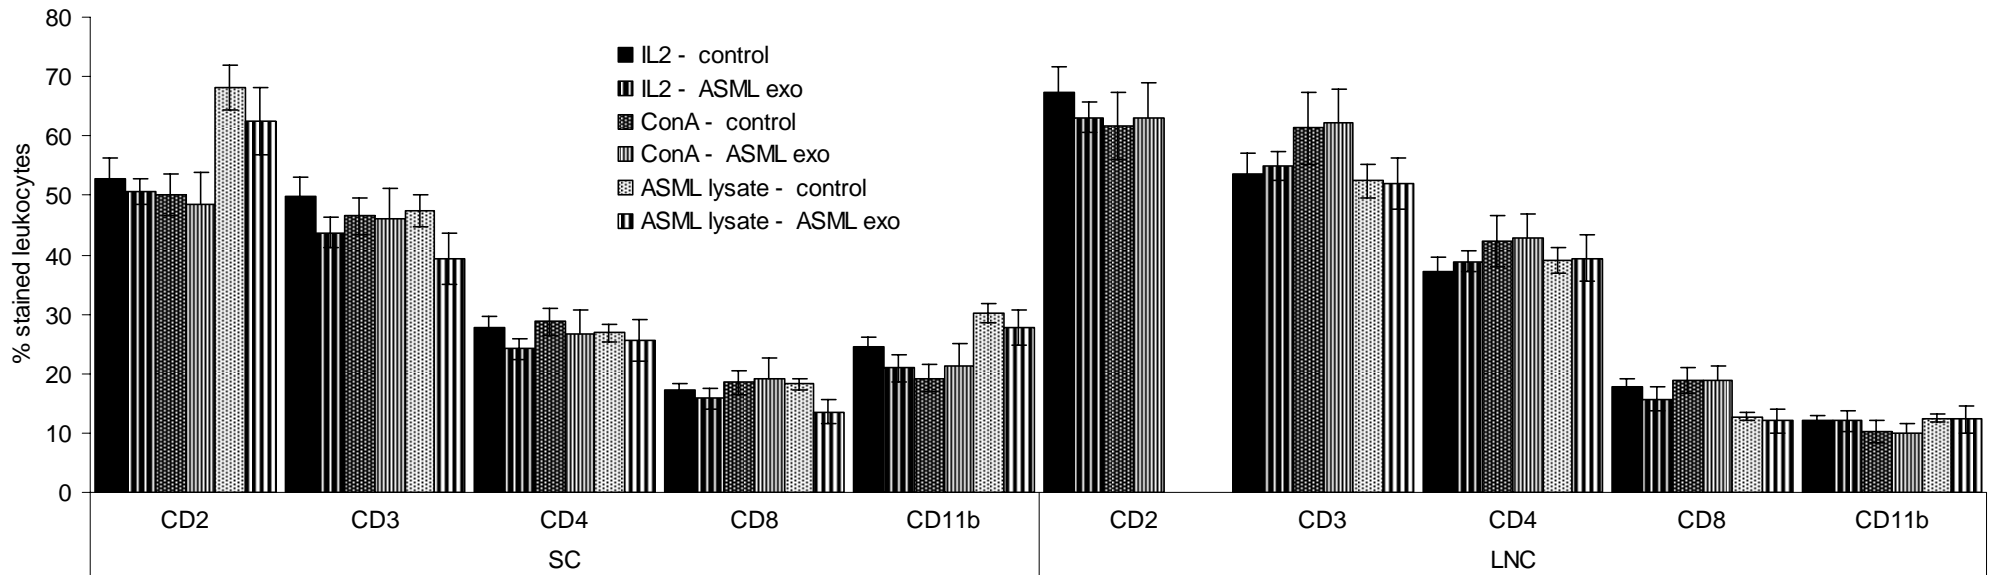

Add.File 2 Impact of ASML-exosomes on major leukocyte subsets SC and LNC were stimulated with IL2, ConA or ASML-lysate with/without ASML-exosomes. Leukocyte marker expression was evaluated by flow-cytometry: Mean percent $\pm$ SD (3 experiments) of stained cells; No significant differences in the presence of ASML-exosomes.
