# Supplementary material for: Tumor-exosomes and leukocyte activation: an ambivalent crosstalk
Source: PubMed Central journal article supplement (PMC3519567; doi:10.1186/1478-811x-10-37), 2012-11-28
Supplement: 1478-811X-10-37-S4.pdf [file 1478-811X-10-37-S4.pdf]

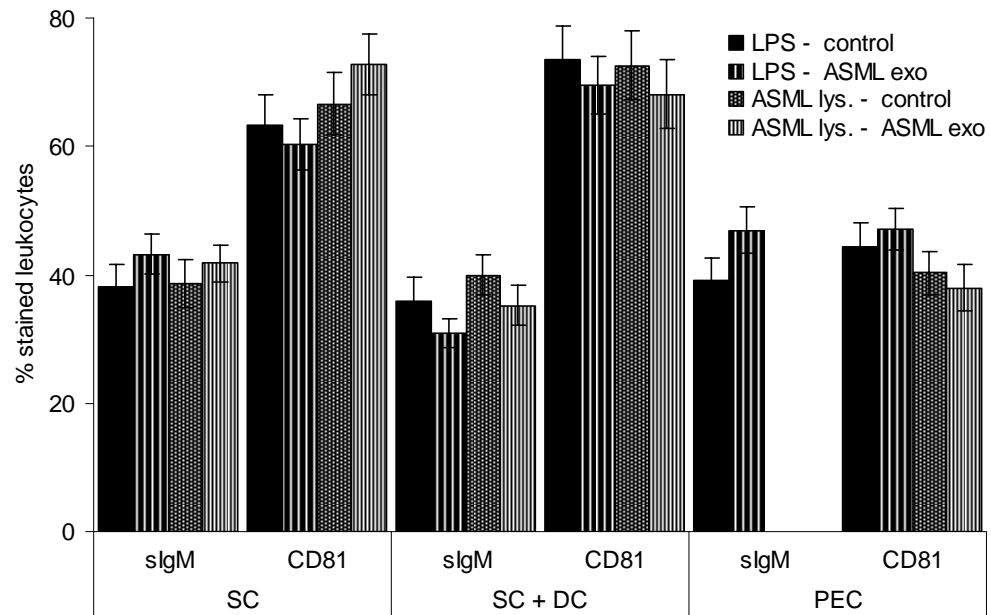

Add. File 4 Tumor exosomes and B cell activation SC and PEC were stimulated for 48h by LPS or ASML-lysate with/without ASML-exosomes. Where indicated, cultures contained ASML-lysate-pulsed DC. Expression of sIgM and CD81 was evaluated by flow-cytometry: Mean percent $\pm$ SD (3 experiments) of stained cells.
