# Supplementary material for: Tumor-exosomes and leukocyte activation: an ambivalent crosstalk
Source: PubMed Central journal article supplement (PMC3519567; doi:10.1186/1478-811x-10-37), 2012-11-28
Supplement: 1478-811X-10-37-S7.pdf [file 1478-811X-10-37-S7.pdf]

## Additional File 7

**Antibodies**

| Antibody                                                                                                        | Supplier                                     | Antibody       | Supplier                     |
|-----------------------------------------------------------------------------------------------------------------|----------------------------------------------|----------------|------------------------------|
| Akt                                                                                                             | BD <sup>1</sup> , Heidelberg, G <sup>2</sup> | ezrin          | SantaCruz, Heidelberg,G      |
| Bad                                                                                                             | SantaCruz, Heidelberg,G                      | fyn            | SantaCruz, Heidelberg,G      |
| Bak                                                                                                             | BD, Heidelberg,G                             | Gr1            | BD, Heidelberg, G            |
| Bax                                                                                                             | BD, Heidelberg, G                            | granzymeB      | BD, Heidelberg, G            |
| Bcl2                                                                                                            | BD, Heidelberg, G                            | IgM (rat)      | Dianova, Hamburg,G           |
| BclX1                                                                                                           | BD, Heidelberg, G                            | IFN $\gamma$   | BD, Heidelberg, G            |
| Bid                                                                                                             | BD, Heidelberg, G                            | I $\kappa$ B   | Cell Signaling, Frankfurt, G |
| Casp3,activ.                                                                                                    | BD, Heidelberg, G                            | IL2            | BD, Heidelberg, G            |
| Casp8                                                                                                           | BD, Heidelberg, G                            | JNK            | BD, Heidelberg, G            |
| Casp9,cleaved                                                                                                   | SantaCruz, Heidelberg,G                      | LAT            | SantaCruz, Heidelberg,G      |
| CD2                                                                                                             | clone Ox34 (EACC) <sup>3</sup>               | lck            | SantaCruz, Heidelberg,G      |
| CD3                                                                                                             | clone R73 (ref 1 <sup>1</sup> )              | MHCII          | clone Ox6 (EACC)             |
| CD4                                                                                                             | clone Ox35 (EACC)                            | NKR-P1B        | BD, Heidelberg, G            |
| CD8                                                                                                             | clone Ox8 (EACC)                             | p-Akt          | BD, Heidelberg, G            |
| CD9                                                                                                             | clone B2C11, DSHB <sup>4</sup>               | p-Bad          | SantaCruz, Heidelberg,G      |
| CD11a                                                                                                           | BD, Heidelberg, G                            | p-c-jun        | Santa Cruz, Heidelberg, G.   |
| CD11b                                                                                                           | clone Ox42 (EACC)                            | p-ERK1/2       | BD, Heidelberg, G            |
| CD11c                                                                                                           | clone Ox41 (EACC)                            | p-ezrin        | SantaCruz, Heidelberg,G      |
| CD18                                                                                                            | BD, Heidelberg, G                            | p-FAK          | BD, Heidelberg, G            |
| CD25                                                                                                            | clone Ox38 (EACC)                            | p-fyn          | Santa Cruz, Heidelberg, G    |
| CD28                                                                                                            | clone Ox61 (EACC)                            | PI3K           | Santa Cruz, Heidelberg, G    |
| CD44                                                                                                            | clone Ox50 (EACC)                            | p-PI3K         | Santa Cruz, Heidelberg, G    |
| CD44v6                                                                                                          | clone A2.6 (ref.2)                           | p-I $\kappa$ B | Cell Signaling, Frankfurt, G |
| CD49c                                                                                                           | clone Ralph3.1, DSHB,                        | p-JNK          | BD, Heidelberg, G            |
| CD49d                                                                                                           | BD, Heidelberg, G                            | p-LAT          | BD, Heidelberg, G            |
| CD53                                                                                                            | clone Ox44 (EACC)                            | PLC $\gamma$   | BD, Heidelberg, G            |
| CD54                                                                                                            | BD, Heidelberg, G                            | p-PLC $\gamma$ | Cell Signaling, Frankfurt, G |
| CD61                                                                                                            | BD, Heidelberg, G                            | p-lck          | Santa Cruz, Heidelberg, G    |
| CD62L                                                                                                           | BD, Heidelberg, G                            | p-src          | Santa Cruz, Heidelberg, G    |
| CD63                                                                                                            | BD, Heidelberg, G                            | p-Stat5        | Santa Cruz, Heidelberg, G    |
| CD80                                                                                                            | BD, Heidelberg, G                            | p-syk          | Santa Cruz, Heidelberg, G    |
| CD81                                                                                                            | BD, Heidelberg, G                            | p-ZAP70        | Santa Cruz, Heidelberg, G    |
| CD86                                                                                                            | BD, Heidelberg, G                            | SDF1           | Santa Cruz, Heidelberg, G    |
| CD95                                                                                                            | BD, Heidelberg, G                            | SHP1           | Cell Signaling, Frankfurt, G |
| CD106                                                                                                           | BD, Heidelberg, G                            | SHP2           | Cell Signaling, Frankfurt, G |
| CD151                                                                                                           | (ref.3) <sup>5</sup>                         | Smac/Diablo    | BD, Heidelberg, G            |
| CD178                                                                                                           | BD, Heidelberg, G                            | src            | Santa Cruz, Heidelberg, G    |
| c-jun                                                                                                           | SantaCruz, Heidelberg,G                      | TNF $\alpha$   | BD, Heidelberg, G            |
| CXCR4                                                                                                           | SantaCruz, Heidelberg,G                      | TRAF4          | BD, Heidelberg, G            |
| CyclinD3                                                                                                        | Santa Cruz, Heidelberg, G                    | TRAIL          | BD, Heidelberg, G            |
| cytoch.C                                                                                                        | BD, Heidelberg, G                            | Tspan8         | clone D6.1 (ref.2)           |
| ERK1/2                                                                                                          | BD, Heidelberg, G                            | XIAP           | BD, Heidelberg, G            |
| FAK                                                                                                             | BD, Heidelberg, G                            | ZAP70          | BD, Heidelberg, G            |
| FoxP3                                                                                                           | Biozol, Eching, G                            |                |                              |
| mIgG, mIgM, rabbitIgG, goatIgG, hamster IgG, Streptavidin (unlabeled, HRP-, AP-, FITC-, Cy3-, PE-, APC-labeled) |                                              |                | Dianova, Hamburg, G          |

<sup>1</sup> BD: Becton Dickinson, <sup>2</sup> G: Germany, <sup>3</sup> EACC: European Animal Cell Culture Collection, Porton Down, UK, <sup>4</sup> DSHB: Developmental studies hybridoma bank, University of Iowa, Iowa, USA, <sup>5</sup> Besides the rabbit anti-CD151 antibody (ref.3), a corresponding antibody was generated in guinea pig.

## References

1. Lawetzky A, Tiefenthaler G, Kubo R, Hünig T. **Identification and characterization of rat T cell subpopulations expressing T cell receptors alpha/beta and gamma/delta.** *Eur J Immunol* 1990, **20**:343-349.
2. Matzku S, Wenzel A, Liu S, Zöller M. **Antigenic differences between metastatic and non-metastatic rat tumor variants characterized by monoclonal antibodies.** *Cancer Res* 1989, **49**:1294-1299.
3. Claas C, Wahl J, Orlicky D, Karaduman H, Schnölzer M, Kempf T, Zöller M. **The tetraspanin D6.1A and its molecular partners on rat carcinoma cells.** *Biochem J* 2005, **389**:99-110.
